# Supplementary material for: Complement factor H–deficient mice develop spontaneous hepatic tumors
Source: JCI journal article supplement (doi:10.1172/jci135105), 2020-05-05
Supplement: sd1 [file 1]

## Supplemental Data

Complement factor H-deficient mice develop spontaneous hepatic tumors

Jennifer Laskowski, Brandon Renner, Matthew C. Pickering, Natalie J. Serkova, Peter M. Smith-Jones, Eric T. Clambey, Raphael A. Nemenoff, and Joshua M. Thurman

### Supplementary Figures

Figure S1: C3b and iC3b/C3d deposition in *fH*<sup>-/-</sup> liver and kidney (IF)  
Isotype staining (IF)

Figure S2: Immunofluorescent staining of C3b with either COL4 or MECA-32 in *fH*<sup>-/-</sup> liver

Figure S3: Flow cytometry gating

Figure S4: *CFH* in human HCC based on the work of the TCGA and the cBioPortal for Cancer Genomics

### Supplementary Tables

Table S1: *CFH* mutations and mRNA levels and outcomes in human cancers (based on the work of the TCGA and the cBioPortal for Cancer Genomics)

Table S2: Antibodies used in the study

Table S3: Equipment used in the study

Table S4: Software used in the study

Table S5: Housekeeping genes used for NanoString liver mRNA analysis

Table S6: Group sizes and related information for each figure panel  
Mice: gender, strain, age, and tumor status  
Human: group size only

Supplementary Figure S1

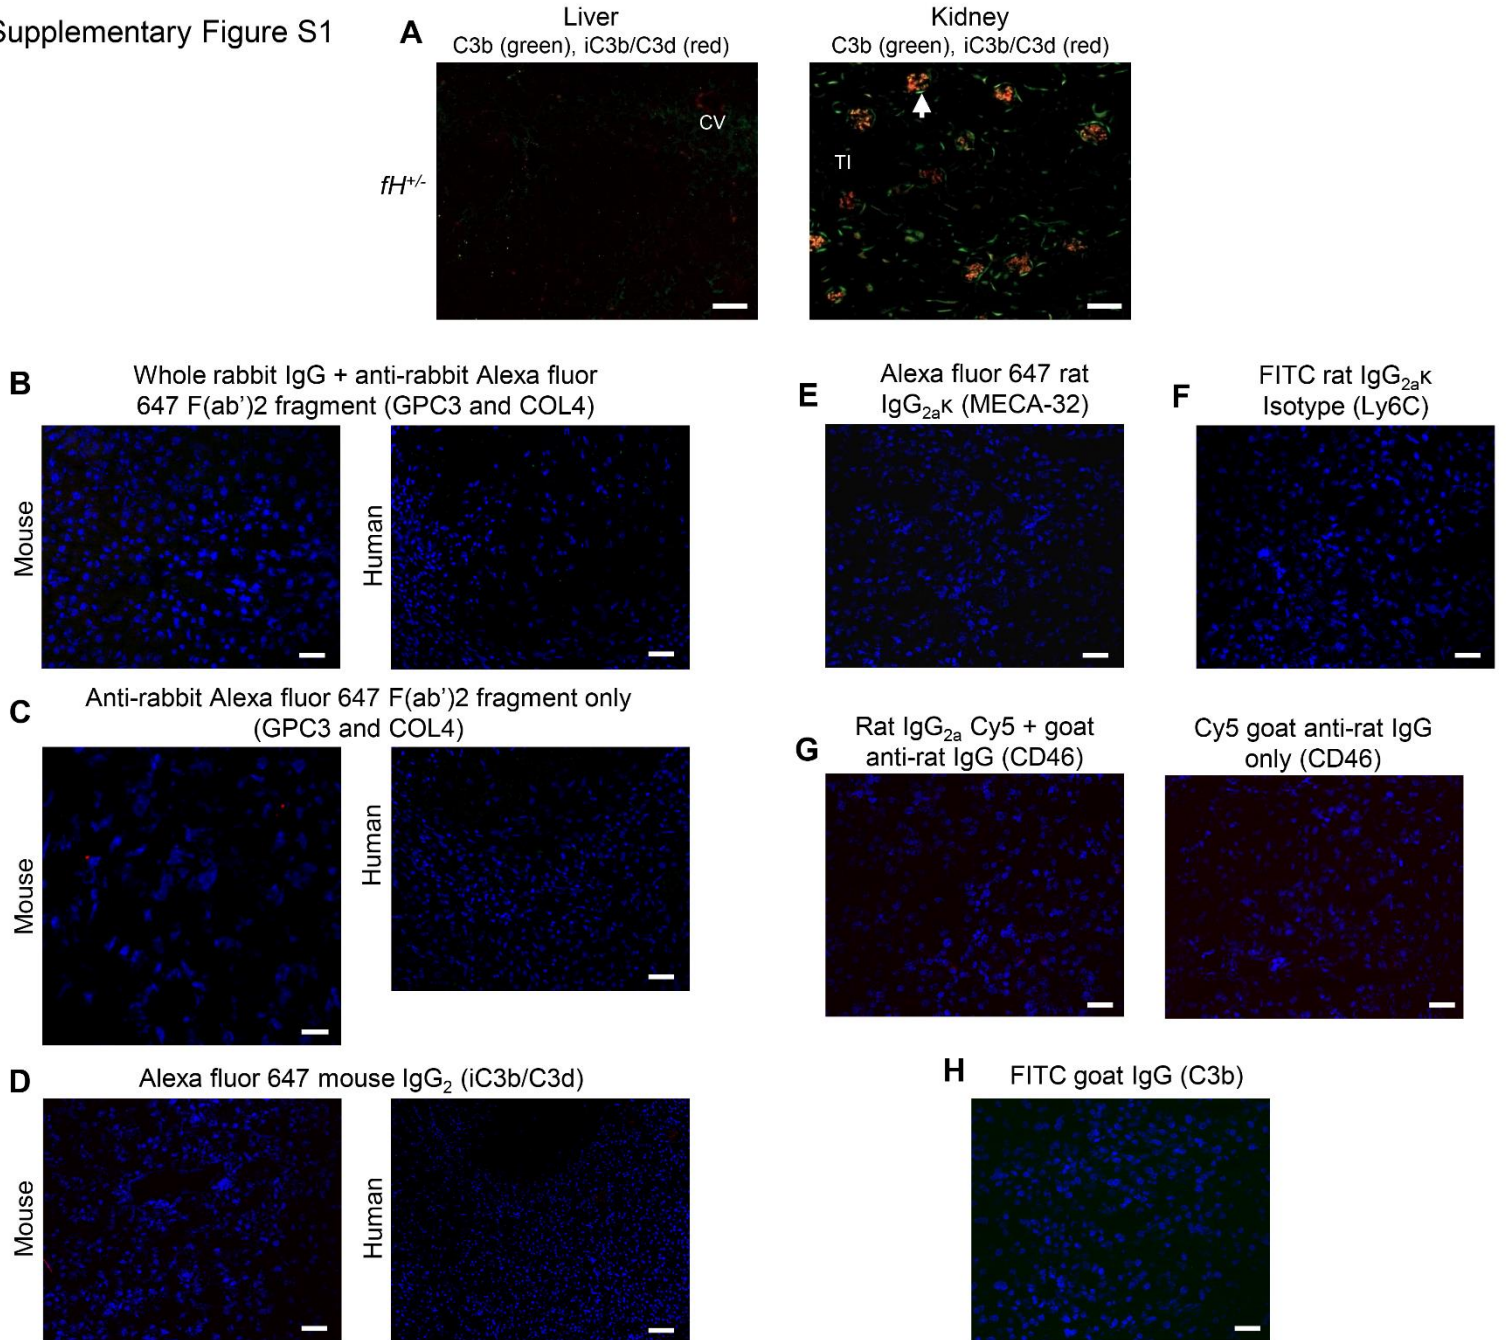

**Supplementary Figure S1.** (A) Representative C3b and iC3b/C3d staining in liver and kidneys (glomerulus indicated by arrow) from *fH*<sup>+/-</sup> mice. Scale = 50 μm (liver) and 100 μm (kidney); n=10 (liver) and 5 (kidney) males (3-5 months old). (B-H) Immunofluorescence isotype staining (target antigen indicated in parentheses). Scale = 50 μm and 100 μm (B, mouse and human, respectively), 20 μm and 100 μm (C, mouse and human, respectively), 100 μm (D), and 50 μm (E-H). CV: central vein; TI: tubulointerstitium.

Supplementary Figure S2

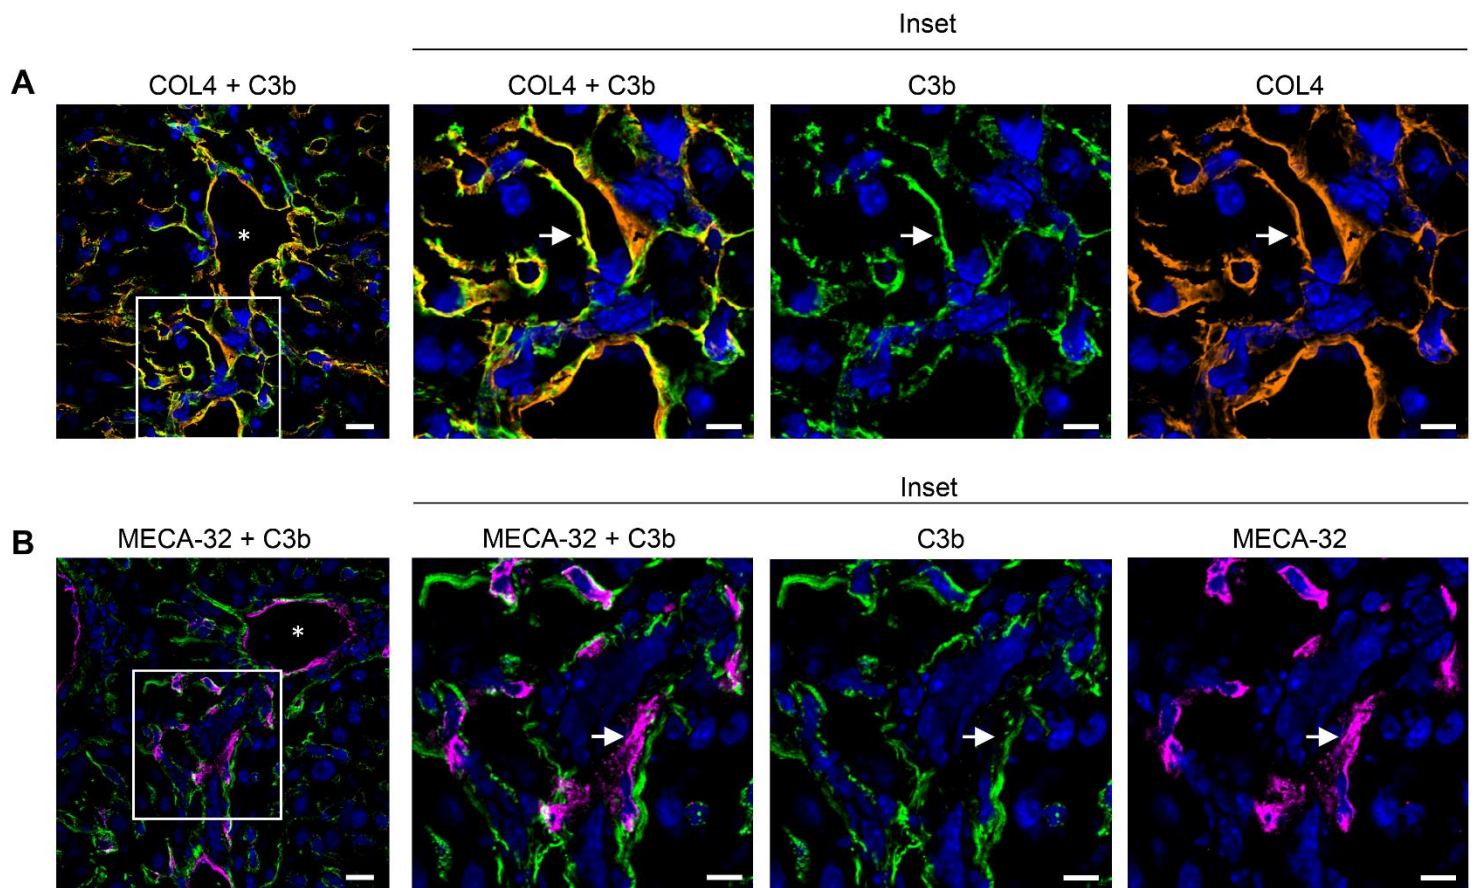

**Supplementary Figure S2.** (A-B) C3b deposition is frequently observed colocalizing with COL4 (A, orange) and adjacent to MECA-32 (B, magenta) in *fh*<sup>-/-</sup> sinusoids, but not on the large vasculature (vascular lumen denoted by asterisks). Nuclei stained with DAPI (blue). Scale=50  $\mu$ m (A and B, left-most images) or 10  $\mu$ m (all other images); n=5 males (7 months). Representative images shown from four independent experiments.

Supplementary Figure S3

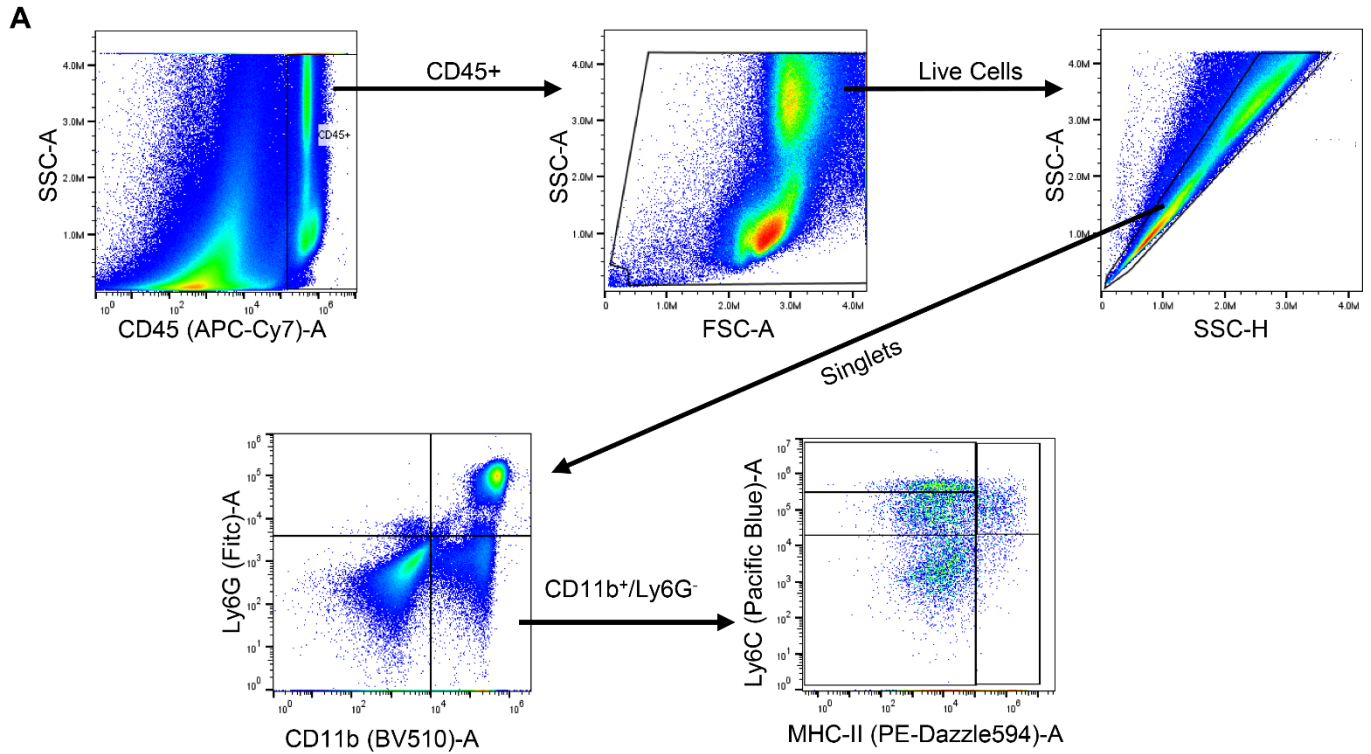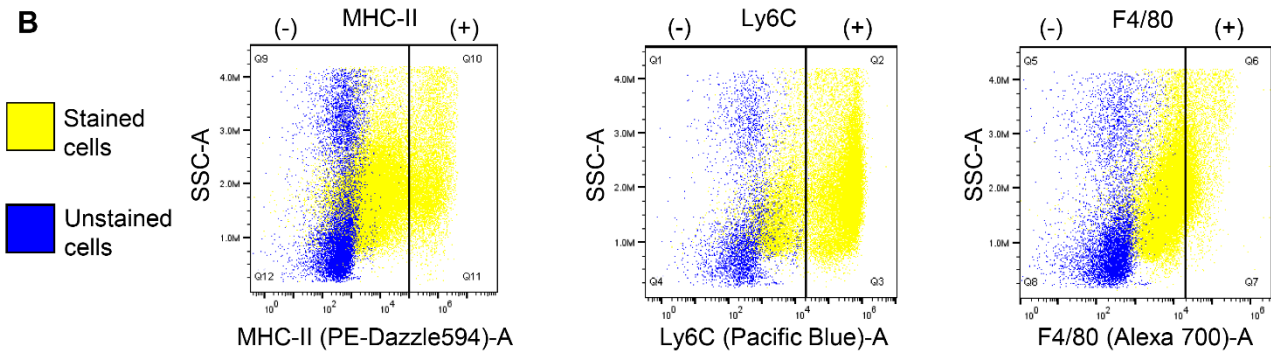

**Supplementary Figure S3. Liver myeloid cell multispectral flow cytometry gating strategy.** (A) Spectrally unmixed hepatic single cell suspensions were first gated on CD45 positivity, followed by cell viability and selection of single cells. Next, polymorphonuclear cells were excluded based on CD11b<sup>+</sup> and Ly6G<sup>+</sup> expression, leaving the CD45<sup>+</sup>CD11b<sup>+</sup>Ly6G<sup>-</sup> myeloid cell population. Myeloid cells were further characterized based on Ly6C and MHC-II expression followed by back gating on F4/80. (B) Pseudo color dot plot illustrating the respective positive/negative gates for MHC-II (PE-Dazzle594), Ly6C (Pacific Blue), and F4/80 (Alexa fluor 700). Negative, unstained cells (blue) and positive, stained cells (yellow).



Supplementary Figure S4

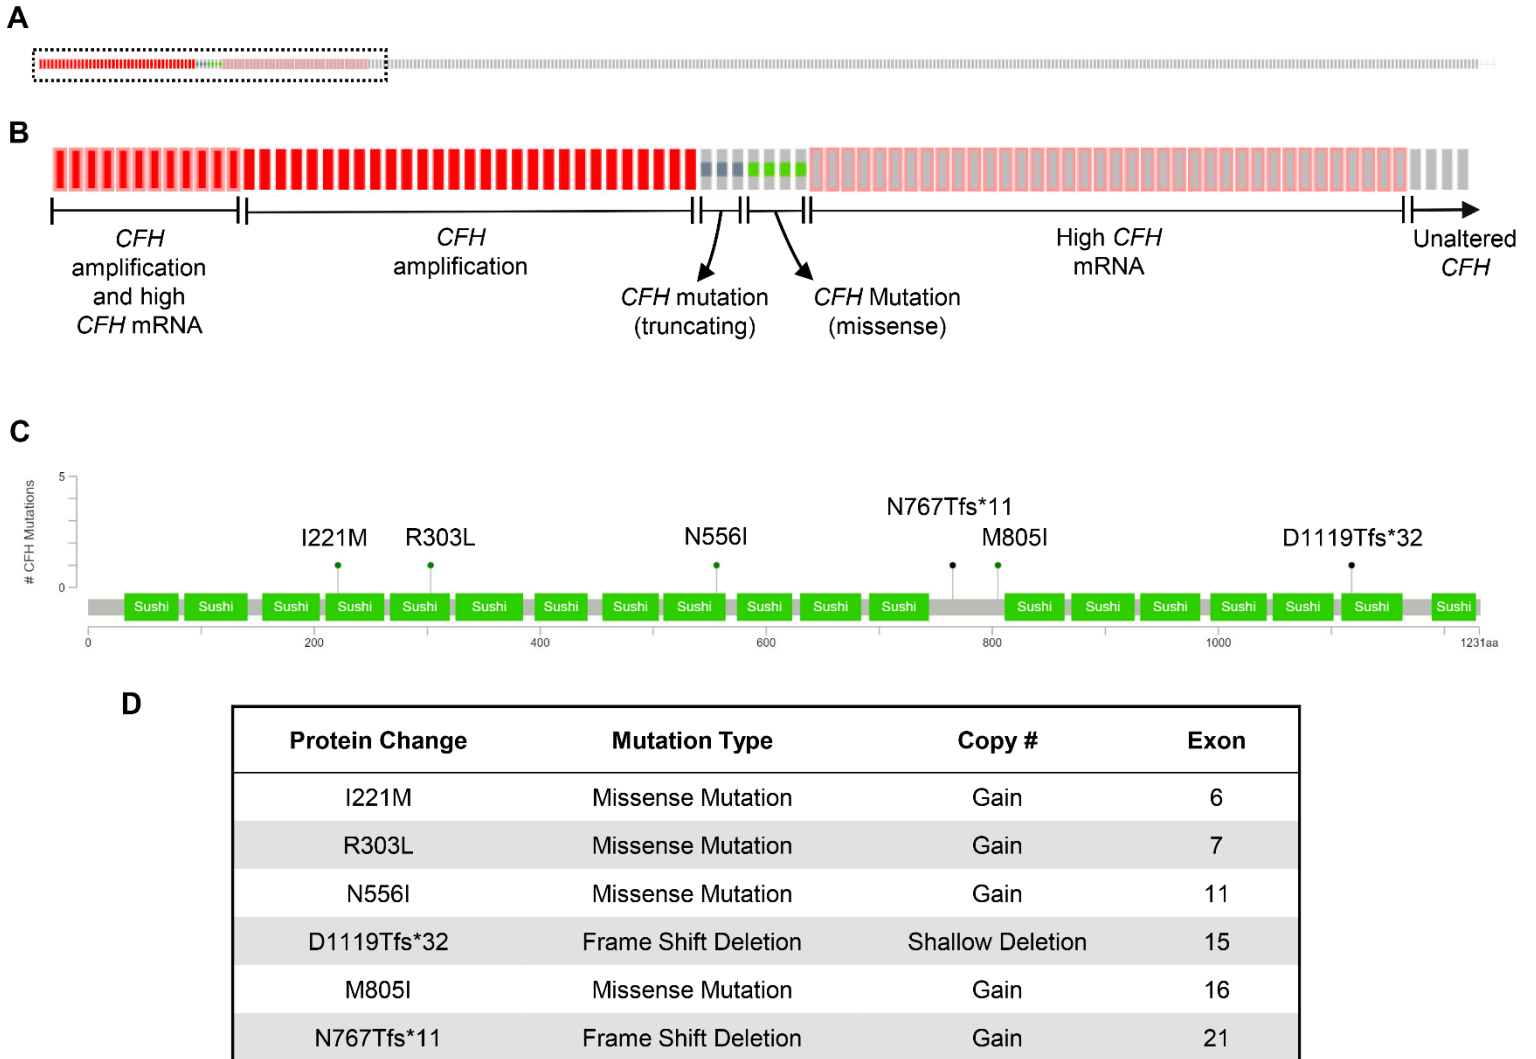

**Supplementary Figure S4. CFH alterations in human HCC data.** (A) Cartoon depicting human HCC TCGA data accessed at cbioportal.org. A total of 442 tumors from 440 patients in the Liver Hepatocellular Carcinoma (TCGA Firehose Legacy) study is represented, each by a hash mark. (B) Magnified view of the 86 tumors (23% of the group) with a *CFH* genetic alteration. Amplifications (derived from copy-number analysis) are shown in red, followed by truncating mutations (blue stripe), missense mutations (green stripe), and high *CFH* mRNA expression (pink outline). (C) Cartoon depicting the human *CFH* protein with “lollipop” markers identifying each mutation and its location. (D) Six identified *CFH* mutations observed in HCC tumors from this study, detailing mutation type and location, protein change, and the exon within which each mutation occurs.

Supplementary Table S1

*P* value legend

|                   |    |
|-------------------|----|
| Adverse outcome   |    |
| $P \leq 0.05$     | NS |
| Favorable outcome |    |
| $P \leq 0.05$     | NS |

| CFH Mutation               |                            |                                            | High CFH mRNA              |                            |                                            |
|----------------------------|----------------------------|--------------------------------------------|----------------------------|----------------------------|--------------------------------------------|
| Frequency / cases profiled | Median Months Survival * ^ | Median Months Disease-Free Progression * ^ | Frequency / cases profiled | Median Months Survival * ^ | Median Months Disease-Free Progression * ^ |
| <i>P</i> value             | <i>P</i> value             | <i>P</i> value                             | <i>P</i> value             | <i>P</i> value             | <i>P</i> value                             |

**CFH mutation associated with adverse outcome; high CFH mRNA associated with favorable outcome**

|                                                 |          |                  |                  |           |                     |                     |
|-------------------------------------------------|----------|------------------|------------------|-----------|---------------------|---------------------|
| Hepatocellular Carcinoma                        | 2% / 373 | -35.05<br>0.0332 | -11.27<br>0.0824 | 13% / 373 | NA, 51.25<br>0.0219 | 36.65<br>0.002254   |
| Lymphoid Neoplasm Diffuse Large B-Cell Lymphoma | 4% / 48  | -169.94<br>0.089 | -109.43<br>0.062 | 4% / 48   | NA, 211.07<br>0.634 | NA, 120.53<br>0.579 |
| Lung Adenocarcinoma                             | 7% / 230 | -2.33<br>0.947   | -23.33<br>0.0112 | 4% / 517  | NA, 49.24<br>0.274  | 11<br>0.107         |
| Esophageal Carcinoma                            | 5% / 185 | -4.96<br>0.886   | -4.99<br>0.669   | 7% / 184  | 5.78<br>0.75        | 9.52<br>0.765       |

**CFH mutation and/or high CFH mRNA associated with adverse outcome**

|                                                                  |            |                    |                       |            |                      |                     |
|------------------------------------------------------------------|------------|--------------------|-----------------------|------------|----------------------|---------------------|
| Brain - Lower Grade Glioma                                       | 1% / 286   | -38.07<br>0.0177   | -38.5<br>0.0822       | 1% / 286   | -83.68<br>0          | NA, 47.7<br>NaN     |
| Bladder Urothelial Carcinoma                                     | 3% / 238   | -14.52<br>0.0682   | -7.49<br>0.854        | 6% / 408   | -15.47<br>0.588      | -9.19<br>0.401      |
| Head and Neck Squamous Cell Carcinoma                            | 3% / 510   | -36.37<br>0.0975   | -15.14<br>0.463       | 5% / 520   | -19.22<br>0.931      | -32.98<br>0.943     |
| Sarcoma                                                          | 2% / 252   | -42.05<br>0.835    | -29.76<br>0.546       | 2.7% / 252 | -51.38<br>0.471      | -27.69<br>0.309     |
| Kidney Renal Cell Carcinoma                                      | 1% / 451   | -18.86<br>0.763    | NA, 123.72<br>0.343   | 4% / 534   | -37.42<br>0.398      | NA, 123.72<br>0.88  |
| Cervical Squamous Cell Carcinoma and Endocervical Adenocarcinoma | 3% / 194   | -113.27<br>0.0164  | NA, NA<br>NaN         | 9% / 304   | -39.35<br>0.64       | NA, NA<br>0.527     |
| Adrenocortical Carcinoma                                         | 2.2% / 90  | 39.55, NA<br>0.687 | 11.53, 37.75<br>0.243 | 6% / 79    | -59.99<br>0.216      | -20.34<br>0.474     |
| Uveal Melanoma                                                   | 0% / 80    | --                 | --                    | 1.3% / 80  | 31.04, NA<br>0.0205  | -34.96<br>0.0452    |
| Acute Myeloid Leukemia                                           | 0% / 197   | --                 | --                    | 2.3% / 173 | -16.06<br>0.00008084 | NA, NA<br>--        |
| Colorectal Adenocarcinoma                                        | 4% / 223   | NA, NA<br>0.492    | NA, NA<br>0.315       | 5% / 379   | -45.63<br>0.0427     | NA, 74.57<br>0.756  |
| Stomach Adenocarcinoma                                           | 7% / 395   | NA, 30.88<br>0.57  | NA, 55.06<br>0.134    | 2% / 415   | -21.91<br>0.0355     | -33.94<br>0.756     |
| Cholangiocarcinoma                                               | 0%         | --                 | --                    | 11% / 36   | -24.77<br>0.522      | -7.62<br>0.785      |
| Breast Invasive Carcinoma                                        | 1% / 982   | NA, 129.6<br>0.314 | NA, 214.72<br>0.258   | 1% / 1093  | -15.87<br>0.238      | NA, 214.72<br>0.722 |
| Testicular Germ Cell Cancer                                      | 0.7% / 155 | NA, NA<br>0.869    | NA, 142<br>0.604      | 5% / 156   | NA, NA<br>0.723      | -176.61<br>0.108    |

**CFH mutation and/or high CFH mRNA associated with favorable outcome**

|                                      |            |                  |                     |          |                 |                     |
|--------------------------------------|------------|------------------|---------------------|----------|-----------------|---------------------|
| Uterine Corpus Endometrial Carcinoma | 6% / 248   | NA, NA<br>0.0711 | NA, NA<br>0.0335    | 0% / 248 | --              | --                  |
| Cutaneous Melanoma                   | 11% / 368  | 13.1<br>0.397    | 5.32<br>0.453       | 2% / 368 | 56.74<br>0.495  | 71.06<br>0.27       |
| Pancreatic Adenocarcinoma            | 1% / 150   | 0.16<br>0.686    | 2.14<br>0.787       | 3% / 179 | 23.82<br>0.697  | -3.59<br>0.785      |
| Glioblastoma Multiforme              | 0.7% / 290 | 3.32<br>0.829    | 4.5<br>0.599        | 4% / 528 | 0.49<br>0.272   | -0.23<br>0.37       |
| Prostate Adenocarcinoma              | 2% / 498   | NA, NA<br>0.77   | 48.39, NA<br>0.0339 | 4% / 498 | NA, NA<br>0.544 | 69.12, NA<br>0.903  |
| Kidney Chromophobe                   | 0% / 66    | --               | --                  | 8% / 66  | NA, NA<br>0.31  | NA, 151.84<br>0.317 |

**Undetermined or no apparent affect on outcome with either CFH mutation and/or increased CFH mRNA**

|                                    |            |                |                 |            |                 |                   |
|------------------------------------|------------|----------------|-----------------|------------|-----------------|-------------------|
| Lung Squamous Cell Carcinoma       | 4% / 179   | 18.33<br>0.834 | -30.94<br>0.157 | 2.4% / 501 | -16.1<br>0.883  | NA, 58.9<br>0.513 |
| Ovarian Serous Cystadenocarcinoma  | 0% / 316   | --             | --              | 4% / 307   | -3.25<br>0.406  | 0.3<br>0.3        |
| Mesothelioma                       | 0% / 87    | Not available  | Not available   | 13% / 87   | Not available   | Not available     |
| Thymoma                            | 0% / 123   | --             | --              | 3% / 120   | NA, NA<br>0.644 | NA, NA<br>0.408   |
| Thyroid Carcinoma                  | 0% / 405   | --             | --              | 4% / 509   | NA, NA<br>0.139 | NA, NA<br>0.875   |
| Uterine Carcinosarcoma             | 0% / 57    | Not available  | Not available   | 7% / 57    | Not available   | Not available     |
| Pheochromocytoma and Paraganglioma | 0.6% / 184 | Not available  |                 | 4% / 184   | Not Available   |                   |

*P* values presented as logrank

\* Median months survival and disease-free progression of patients with *CFH* alteration compared to those without

^ When two values are given: the first corresponds to patients with *CFH* alteration, the second to those without.

NS: not significant; NA: not applicable

Supplementary Table S2

| Name                                                                      | Supplier or Citation            | Catalog Number   | Clone       | Source and isotype (if applicable) | Experimental Concentration (µg/ml) or Dilution |
|---------------------------------------------------------------------------|---------------------------------|------------------|-------------|------------------------------------|------------------------------------------------|
| Human/Mouse Glypican 3                                                    | Abcam                           | ab66596          | pAb         | Rabbit                             | 1                                              |
| Mouse Collagen IV                                                         | EMD Millipore                   | AB756P           | pAb         | Rabbit                             | 4                                              |
| MECA-32 Panendothelial cell antigen (Alexa Fluor 647)                     | Novus Biologicals               | NB100-77668AF647 | --          | Rat IgG <sub>2a</sub> K            | 7.5                                            |
| Mouse C3b (FITC)                                                          | MP Biomedicals                  | 55500            | pAb         | Goat                               | 5                                              |
| Mouse CD46                                                                | Hycult Biotech                  | HM1118           | MM10        | Rat IgG <sub>2a</sub>              | 2                                              |
| Mouse/Human iC3b/C3d (Alexa Fluor 647)                                    | (25)                            | --               | C3d29       | Mouse IgG <sub>2a</sub>            | 1                                              |
| Mouse/Human iC3b/C3d (DyLight 555)                                        | (25)                            | --               | C3d29       | Mouse IgG <sub>2a</sub>            | 1                                              |
| Rat IgG <sub>2a</sub> K Isotype control (FITC)                            | Southern Biotechnology          | 0117-02          | KLH/G2a-1-1 | Goat                               | 5                                              |
| ChromePure Rabbit IgG                                                     | Jackson ImmunoResearch          | 011-000-003      | pAb         | Rabbit                             | 1                                              |
| ChromePure Goat IgG (FITC)                                                | Jackson ImmunoResearch          | 005-090003       | pAb         | Goat                               | 5                                              |
| Rat IgG <sub>2a</sub> K Isotype control (Alexa fluor 647)                 | Southern Biotechnology          | 0117-31          | KLH/G2a-1-1 | Goat                               | 7.5                                            |
| Rat IgG <sub>2a</sub> Isotype control                                     | BD Bioscience                   | 553928           | R35-95      | Rat                                | 2                                              |
| Mouse IgG <sub>2</sub> Isotype (Alexa fluor 647)                          | Produced and validated in house | --               | 10-5C6      | Mouse IgG <sub>2</sub>             | 1                                              |
| CD3ε                                                                      | Cell Signaling Technology       | 99940S           | D4V8L       | Rabbit                             | 0.86                                           |
| FoxP3                                                                     | ebioscience                     | 14-5773          | FJK-16s     | Rat IgG <sub>2a</sub> K            | 2.5                                            |
| CD4                                                                       | ebioscience                     | 14-9766-82       | 4SM95       | Rat IgG <sub>1</sub> K             | 2.5                                            |
| CD8a                                                                      | ebioscience                     | 14-0808-80       | 4SM15       | Rat IgG <sub>2a</sub> λ            | 5                                              |
| F4/80                                                                     | Cell Signaling Technology       | 70076S           | D2S9R       | Rabbit                             | 4.35                                           |
| B220 (CD45R)                                                              | BD Biosciences                  | 557390           | RA3-6B2     | Rat IgG <sub>2a</sub> K            | 0.5                                            |
| Mouse CD45 (APC/Cy7)                                                      | Biolegend                       | 103115           | 30-F11      | Rat IgG <sub>2b</sub> K            | 0.2                                            |
| Mouse Ly-6G (FITC)                                                        | BD Bioscience                   | 551460           | 1A8         | Rat IgG <sub>2a</sub> K            | 0.2 (FC) / 5 (IF)                              |
| Mouse CD11b (BV510)                                                       | BD Bioscience                   | 562950           | M1/70       | Rat DA/HA IgG <sub>2b</sub> K      | 0.2                                            |
| Mouse F4/80 (Alexa fluor 700)                                             | BioRad                          | MCA497A700T      | A3-1        | Rat IgG <sub>2b</sub>              | 0.2                                            |
| Mouse Ly-6C (Pacific Blue)                                                | BioRad                          | MCA2389PB        | ER-MP20     | Rat IgG <sub>2a</sub>              | 0.2                                            |
| Mouse I-A/I-E [MHC class II] (PE/Dazzle 594)                              | BioLegend                       | 107647           | M5/114.15.2 | Rat IgG <sub>2b</sub> K            | 0.2                                            |
| Alexa Fluor 647 F(ab') <sub>2</sub> fragment donkey anti-rabbit IgG (H+L) | Jackson ImmunoResearch          | 711-606-152      | pAb         | Donkey                             | 3.75                                           |
| Cy5 AffiniPure goat anti-rat IgG (H+L)                                    | Jackson ImmunoResearch          | 112-175-143      | pAb         | Goat                               | 3.75                                           |
| Rat-on-Mouse HRP Polymer                                                  | Biocare                         | RT517L           | pAb         | Rat                                | Per supplier instructions                      |
| Anti-rabbit HRP                                                           | Akoya Biosciences               | ARR1001KT        | pAb         | Rabbit and mouse cocktail          | 1:4                                            |
| Mouse CD16/CD32 Fc Block                                                  | BD Biosciences                  | 553142           | 2.4G2       | Rat IgG <sub>2b</sub> K            | 1                                              |
| AffiniPure donkey anti-mouse IgG (H+L)                                    | Jackson ImmunoResearch          | 715-005-151      | pAb         | Donkey                             | 10                                             |
| Opal 520 reactive fluorophore                                             | Akoya Biosciences               | FP1487001KT      | N/A         | N/A                                | 1:150                                          |
| Opal 540 reactive fluorophore                                             | Akoya Biosciences               | FP1494001KT      | N/A         | N/A                                | 1:100                                          |
| Opal 570 reactive fluorophore                                             | Akoya Biosciences               | FP1488001KT      | N/A         | N/A                                | 1:300                                          |
| Opal 620 reactive fluorophore                                             | Akoya Biosciences               | FP1495001KT      | N/A         | N/A                                | 1:150                                          |
| Opal 650 reactive fluorophore                                             | Akoya Biosciences               | FP1496001KT      | N/A         | N/A                                | 1:150                                          |
| Opal 690 reactive fluorophore                                             | Akoya Biosciences               | FP1497001KT      | N/A         | N/A                                | 1:50                                           |

pAb: polyclonal antibody

FC: flow cytometry

IF: immunofluorescence

Supplementary Table S3

| Equipment / Model                                   | Manufacturer                                | Figure(s)                                         |
|-----------------------------------------------------|---------------------------------------------|---------------------------------------------------|
| FV1000 FCS confocal microscope                      | Olympus Scientific Solutions Americas Corp. | 1H-1J; 2A-2C; 5E; 7A-7D, 7F-7G; 8A-8E; 9A; S1; S2 |
| Axio Observer D1 epifluorescent inverted microscope | Carl Zeiss Microscopy, LLC                  | 1E-1G; 2D-2F; 3B;3D, S1A (kidney)                 |
| Siemens Inveon microPET/CT scanner                  | Siemens Medical Solutions                   | 2I                                                |
| DriChem 7000 Analyzer                               | Heska                                       | 3A                                                |
| nCounter Max Analysis System                        | NanoString Technologies                     | 4A-4I                                             |
| Bond-III Fully Automated IHC and ISH Autostainer    | Leica Biosystems                            | 5A-5B                                             |
| Vectra 3.0 Qualitative Pathology                    | Perkin Elmer                                | 5A-5B                                             |
| Aurora multi-spectral flow cytometer                | Cytek Biosciences                           | 5D and 6A-6D                                      |

Supplementary Table S4

| Software                                                | Manufacturer                                                                                  | Version     |
|---------------------------------------------------------|-----------------------------------------------------------------------------------------------|-------------|
| FV10-ASW                                                | Olympus Scientific Solutions Americas Corp.                                                   | 04.02.02.09 |
| Zen (Blue edition)                                      | Carl Zeiss Microscopy, LLC                                                                    | 2.6         |
| nSolver                                                 | nanoString                                                                                    | 4           |
| nCounter Advanced Analysis                              | nanoString                                                                                    | 2.0.115     |
| R                                                       | r-project.org                                                                                 | 3.3.2       |
| FlowJo                                                  | BD (Becton, Dickinson and Company)                                                            | 10.6.0      |
| Prism                                                   | GraphPad                                                                                      | 8.4.2       |
| inForm Tissue Finder                                    | Akoya Biosciences                                                                             | 2.4.1       |
| Phenochart Whole Slide Contextual Viewer for Annotation | Akoya Biosciences                                                                             | 1.0.8       |
| SpectroFlo                                              | Cytek Biosciences                                                                             | 2.1.0       |
| Image J                                                 | National Institutes of Health <a href="http://imagej.nih.gov/ij">http://imagej.nih.gov/ij</a> | 1.51w       |
| AsiProVM                                                | Concorde Microsystems                                                                         | 6.7.1.1     |



Supplementary Table S5

| <b>Gene Name</b>    | <b>Full Official Name</b>                                     | <b>Gene Accession</b> | <b>Order selected by geNorm</b> | <b>SD after normalization</b> |
|---------------------|---------------------------------------------------------------|-----------------------|---------------------------------|-------------------------------|
| <i>Ppia</i> -mRNA   | peptidylprolyl isomerase A                                    | NM_008907.2           | 1                               | 0.162                         |
| <i>Oaz1</i> -mRNA   | ornithine decarboxylase antizyme 1                            | NM_008753.4           | 2                               | 0.167                         |
| <i>Rpl19</i> -mRNA  | ribosomal protein L19                                         | NM_009078.2           | 3                               | 0.160                         |
| <i>Hprt</i> -mRNA   | hypoxanthine guanine phosphoribosyl transferase               | NM_013556.2           | 4                               | 0.194                         |
| <i>Gusb</i> -mRNA   | glucuronidase, beta                                           | NM_010368.2           | 5                               | 0.164                         |
| <i>Nubp1</i> -mRNA  | nucleotide binding protein 1                                  | NM_011955.2           | 6                               | 0.179                         |
| <i>Eef1g</i> -mRNA  | eukaryotic translation elongation factor 1 gamma              | NM_026007.4           | 7                               | 0.119                         |
| <i>Sf3a3</i> -mRNA  | splicing factor 3a, subunit 3                                 | NM_029157.3           | 8                               | 0.143                         |
| <i>Tubb5</i> -mRNA  | tubulin, beta 5 class I                                       | NM_011655.5           | 9                               | 0.166                         |
| <i>Hdac3</i> -mRNA  | histone deacetylase 3                                         | NM_010411.2           | 10                              | 0.151                         |
| <i>Tbp</i> -mRNA    | TATA box binding protein                                      | NM_013684.3           | 11                              | 0.178                         |
| <i>Abcf1</i> -mRNA  | ATP-binding cassette, sub-family F (GCN20), member 1          | NM_013854.1           | 12                              | 0.177                         |
| <i>Polr2a</i> -mRNA | polymerase (RNA) II (DNA directed) polypeptide A              | NM_001291068.1        | 13                              | 0.203                         |
| <i>Sdha</i> -mRNA   | succinate dehydrogenase complex, subunit A, flavoprotein (Fp) | NM_023281.1           | 14                              | 0.223                         |
| <i>Polr1b</i> -mRNA | polymerase (RNA) I polypeptide B                              | NM_009086.2           | 15                              | 0.233                         |
| <i>Edc3</i> -mRNA   | enhancer of mRNA decapping 3                                  | NM_153799.3           | 16                              | 0.245                         |
| <i>Eif2b4</i> -mRNA | eukaryotic translation initiation factor 2B, subunit 4 delta  | NM_001127355.1        | 17                              | 0.247                         |
| <i>Alas1</i> -mRNA  | aminolevulinic acid synthase 1                                | NM_020559.2           | discarded                       | 0.895                         |
| <i>G6pdx</i> -mRNA  | glucose-6-phosphate dehydrogenase X-linked                    | NM_008062.3           | discarded                       | 0.340                         |
| <i>Sap130</i> -mRNA | Sin3A associated protein                                      | NM_172965.3           | discarded                       | 0.306                         |

Supplementary Table S6

| Figure Number                       | Figure Description                                   | Strain                              | Sex  | Age (months)    | Group size             | Age (months)    | Group size | Age (months)    | Group size |
|-------------------------------------|------------------------------------------------------|-------------------------------------|------|-----------------|------------------------|-----------------|------------|-----------------|------------|
| 1A - 1C and 1D                      | Macroscopic Evaluation and Tumor Incidence           | WT                                  | M    | ≥ 15            | 29                     | 6 - 14          | 21         | ≤ 5             | 13         |
|                                     |                                                      |                                     |      | + hepatic tumor | 2                      | + hepatic tumor | 0          | + hepatic tumor | 0          |
|                                     |                                                      |                                     |      | no tumor        | 27                     | no tumor        | 21         | no tumor        | 13         |
|                                     |                                                      | fH <sup>-/-</sup>                   | M    | ≥ 15            | 35                     | 6 - 14          | 22         | ≤ 5             | 7          |
|                                     |                                                      |                                     |      | + hepatic tumor | 19                     | + hepatic tumor | 2          | + hepatic tumor | 0          |
|                                     |                                                      |                                     |      | no tumor        | 16                     | no tumor        | 20         | no tumor        | 7          |
|                                     |                                                      | fH <sup>-/-</sup> fB <sup>-/-</sup> | M    | ≥ 15            | 10                     | 6 - 14          | 0          | ≤ 5             | 0          |
|                                     |                                                      |                                     |      | + hepatic tumor | 1                      | + hepatic tumor | 0          | + hepatic tumor | 0          |
|                                     |                                                      |                                     |      | no tumor        | 9                      | no tumor        | 0          | no tumor        | 0          |
|                                     |                                                      | WT                                  | F    | ≥ 15            | 29                     | 6 - 14          | 11         | ≤ 5             | 5          |
|                                     |                                                      |                                     |      | + hepatic tumor | 1                      | + hepatic tumor | 0          | + hepatic tumor | 0          |
|                                     |                                                      |                                     |      | no tumor        | 28                     | no tumor        | 11         | no tumor        | 5          |
| fH <sup>-/-</sup>                   | F                                                    | ≥ 15                                | 26   | 6 - 14          | 17                     | ≤ 5             | 5          |                 |            |
|                                     |                                                      | + hepatic tumor                     | 4    | + hepatic tumor | 1                      | + hepatic tumor | 0          |                 |            |
|                                     |                                                      | no tumor                            | 22   | no tumor        | 16                     | no tumor        | 5          |                 |            |
| fH <sup>-/-</sup> fB <sup>-/-</sup> | F                                                    | ≥ 15                                | 10   | 6 - 14          | 0                      | ≤ 5             | 0          |                 |            |
|                                     |                                                      | + hepatic tumor                     | 0    | + hepatic tumor | 0                      | + hepatic tumor | 0          |                 |            |
|                                     |                                                      | no tumor                            | 10   | no tumor        | 0                      | no tumor        | 0          |                 |            |
| 1E-1G                               | H&E: Injury/HCC                                      | WT                                  | M    | ≥ 15            | 20                     |                 |            |                 |            |
|                                     |                                                      | fH <sup>-/-</sup>                   | M    | ≥ 15            | 20                     |                 |            |                 |            |
| 1H - 1J                             | GPC3                                                 | WT                                  | M    | ≥ 15            | 20                     |                 |            |                 |            |
|                                     |                                                      | fH <sup>-/-</sup>                   | M    | ≥ 15            | 20                     |                 |            |                 |            |
| 2A - 2C                             | Liver C3b and iC3b/C3d                               | WT                                  | M    | 3 - 5           | 10                     |                 |            |                 |            |
|                                     |                                                      | fH <sup>-/-</sup>                   | M    | 3 - 5           | 10                     |                 |            |                 |            |
|                                     |                                                      | fH <sup>-/-</sup> fB <sup>-/-</sup> | M    | 3 - 5           | 10                     |                 |            |                 |            |
| 2D - 2F                             | Kidney C3b and iC3b/C3d                              | WT                                  | M    | 3 - 5           | 5                      |                 |            |                 |            |
|                                     |                                                      | fH <sup>-/-</sup>                   | M    | 3 - 5           | 5                      |                 |            |                 |            |
|                                     |                                                      | fH <sup>-/-</sup> fB <sup>-/-</sup> | M    | 3 - 5           | 5                      |                 |            |                 |            |
| 2G                                  | Quantification: Liver C3b - iC3b/C3d                 | WT                                  | M    | 3 - 5           | 10                     |                 |            |                 |            |
|                                     |                                                      | fH <sup>-/-</sup>                   | M    | 3 - 5           | 10                     |                 |            |                 |            |
|                                     |                                                      | fH <sup>-/-</sup> fB <sup>-/-</sup> | M    | 3 - 5           | 10                     |                 |            |                 |            |
| 2H - 2I                             | PET                                                  | WT                                  | M    | 3               | 4                      |                 |            |                 |            |
|                                     |                                                      | fH <sup>-/-</sup>                   | M    | 3               | 4                      |                 |            |                 |            |
| 3A                                  | Liver chemistries                                    | WT                                  | M    | 3               | 5                      |                 |            |                 |            |
|                                     |                                                      | fH <sup>-/-</sup>                   | M    | 3               | 5                      |                 |            |                 |            |
|                                     |                                                      | fH <sup>-/-</sup> fB <sup>-/-</sup> | M    | 3               | 5                      |                 |            |                 |            |
| 3B - 3C                             | Oil Red O staining / quantification                  | WT                                  | M    | 3               | 5 / 5                  |                 |            |                 |            |
|                                     |                                                      | fH <sup>-/-</sup>                   | M    | 3               | 5 / 5                  |                 |            |                 |            |
|                                     |                                                      | WT                                  | M    | 9               | 10 / 5                 |                 |            |                 |            |
|                                     |                                                      | fH <sup>-/-</sup>                   | M    | 9               | 10 / 5                 |                 |            |                 |            |
|                                     |                                                      | WT                                  | M    | 18              | 10 / 5                 |                 |            |                 |            |
|                                     |                                                      | fH <sup>-/-</sup>                   | M    | 18              | 10 / 5                 |                 |            |                 |            |
| 3D - 3E                             | COL4 staining / quantification                       | WT                                  | M    | 14              | 6                      |                 |            |                 |            |
|                                     |                                                      | fH <sup>-/-</sup>                   | M    | 14              | 6                      |                 |            |                 |            |
| 4A - 4I                             | mRNA Analysis                                        | WT                                  | M    | 3               | 5                      |                 |            |                 |            |
|                                     |                                                      | fH <sup>-/-</sup>                   | M    | 3               | 5                      |                 |            |                 |            |
| 5A - 5C                             | Vectra Imaging and Analysis                          | WT                                  | M    | 3               | 5                      |                 |            |                 |            |
|                                     |                                                      | fH <sup>-/-</sup>                   | M    | 3               | 5                      |                 |            |                 |            |
| 5D                                  | Hepatic neutrophils by flow cytometry                | WT                                  | M    | 3               | 3                      |                 |            |                 |            |
|                                     |                                                      | fH <sup>-/-</sup>                   | M    | 3               | 3                      |                 |            |                 |            |
|                                     |                                                      | fH <sup>-/-</sup>                   | M    | 4               | 4                      |                 |            |                 |            |
|                                     |                                                      | fH <sup>-/-</sup> fB <sup>-/-</sup> | M    | 4               | 4                      |                 |            |                 |            |
|                                     |                                                      | fH <sup>-/-</sup> (liver tumors)    | M    | 22 - 24         | 4                      |                 |            |                 |            |
|                                     |                                                      | fH <sup>-/-</sup> (no tumors)       | M    | 22 - 24         | 2                      |                 |            |                 |            |
| 5E                                  | Neutrophils (IF)                                     | fH <sup>-/-</sup> (liver tumors)    | M    | ≥ 15            | 10                     |                 |            |                 |            |
| 6A - 6D                             | Liver myeloid flow cytometry                         | WT                                  | M    | 3               | 3                      |                 |            |                 |            |
|                                     |                                                      | fH <sup>-/-</sup>                   | M    | 3               | 3                      |                 |            |                 |            |
|                                     |                                                      | fH <sup>-/-</sup>                   | M    | 4               | 4                      |                 |            |                 |            |
|                                     |                                                      | fH <sup>-/-</sup> fB <sup>-/-</sup> | M    | 4               | 4                      |                 |            |                 |            |
|                                     |                                                      | fH <sup>-/-</sup> (liver tumors)    | M    | 22 - 24         | 4                      |                 |            |                 |            |
|                                     |                                                      | fH <sup>-/-</sup> (no tumors)       | M    | 22 - 24         | 2                      |                 |            |                 |            |
| 7A - 7B                             | rmCFH-Alexa 647 (IF) and quantification              | WT                                  | M    | 9               | 5                      |                 |            |                 |            |
|                                     |                                                      | fH <sup>-/-</sup>                   | M    | 7               | 5                      |                 |            |                 |            |
| 7C - 7F                             | IF and quantification of deposited C3b and iC3b/C3d  | fH <sup>-/-</sup> + rmCFH           | M    | 7               | 5                      |                 |            |                 |            |
|                                     |                                                      | fH <sup>-/-</sup>                   | M    | 7               | 5                      |                 |            |                 |            |
| 7G - 7H                             | rmCFH, COL4, and MECA-32                             | fH <sup>-/-</sup>                   | M    | 7               | 5                      |                 |            |                 |            |
| 8A                                  | C3b and iC3b/C3d in tumors                           | WT                                  | M    | ≥ 15            | 2                      |                 |            |                 |            |
|                                     |                                                      | fH <sup>-/-</sup>                   | M    | ≥ 15            | 10                     |                 |            |                 |            |
| 8B - 8C                             | GPC3 and C3b or iC3b/C3d in fH <sup>-/-</sup> tumors | fH <sup>-/-</sup>                   | M    | ≥ 15            | 10                     |                 |            |                 |            |
| 8D - 8E                             | CD46 and C3b or iC3b/C3d in fH <sup>-/-</sup> tumors | fH <sup>-/-</sup>                   | M    | ≥ 15            | 10                     |                 |            |                 |            |
| 9A                                  | GPC3 and iC3b/C3d in human HCC biopsies              | --                                  | unkn | unkn            | 6                      |                 |            |                 |            |
| S1A                                 | C3b and iC3b/C3d in liver and kidney                 | fH <sup>-/-</sup>                   | M    | 3 - 5           | 10 (liver), 5 (kidney) |                 |            |                 |            |
| S1B - S1H                           | Immunofluorescence Isotypes (murine)                 | WT                                  | M    | 3, 9, and ≥15   | 3 each                 |                 |            |                 |            |
|                                     |                                                      | fH <sup>-/-</sup>                   | M    | 3, 9, and ≥15   | 3 each                 |                 |            |                 |            |
| S1B - S1D                           | Immunofluorescence Isotypes (human)                  | --                                  | unkn | unkn            | 3                      |                 |            |                 |            |
| S2                                  | COL4 + C3b and MECA-32 + C3b                         | fH <sup>-/-</sup>                   | M    | 7               | 5                      |                 |            |                 |            |
